# Supplementary material for: Zanthoxylum bungeanum Essential Oil: Extraction and Component Analysis for α-Glucosidase Inhibitory Activity and the Underlying Mechanism Based on Molecular Docking
Source: MDPI journal article supplement (doi:10.3390/app13042627), 2023-02-17
Supplement: s1 [file s1]

## Supplementary Information

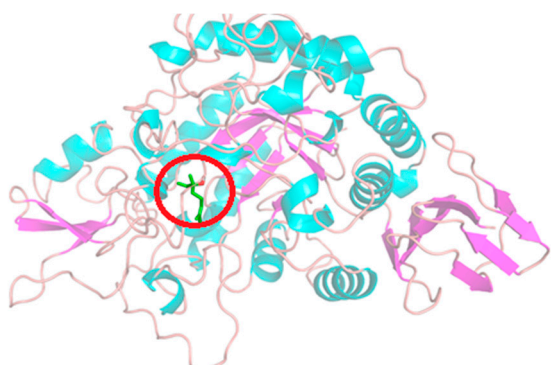

**Figure S1.** Molecular docking pattern of  $\alpha$ -glucosidase and linalool.

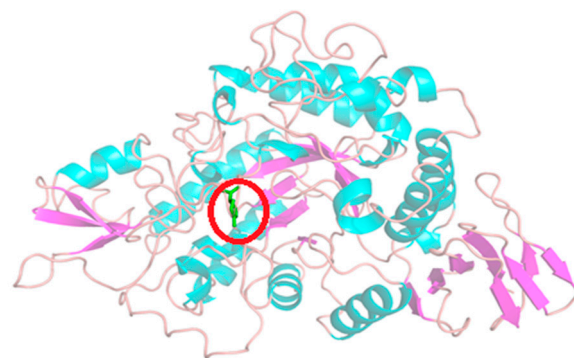

**Figure S2.** Molecular docking pattern of  $\alpha$ -glucosidase and limonene.

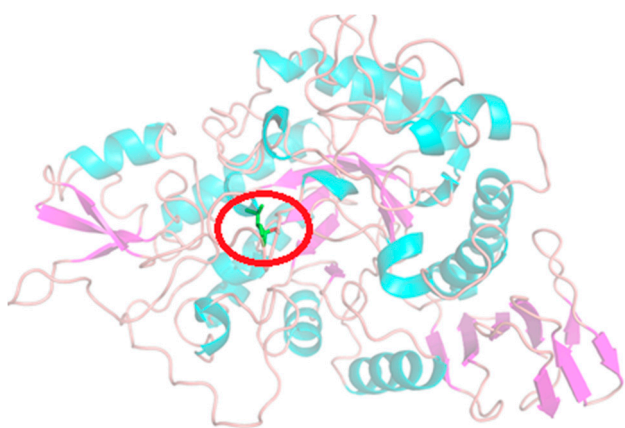

**Figure S3.** Molecular docking pattern of  $\alpha$ -glucosidase and terpineol.

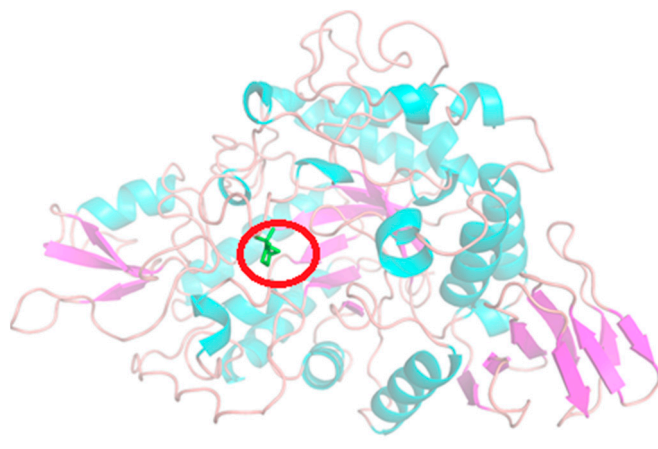

**Figure S4.** Molecular docking pattern of  $\alpha$ -glucosidase and  $\beta$ -pinene.

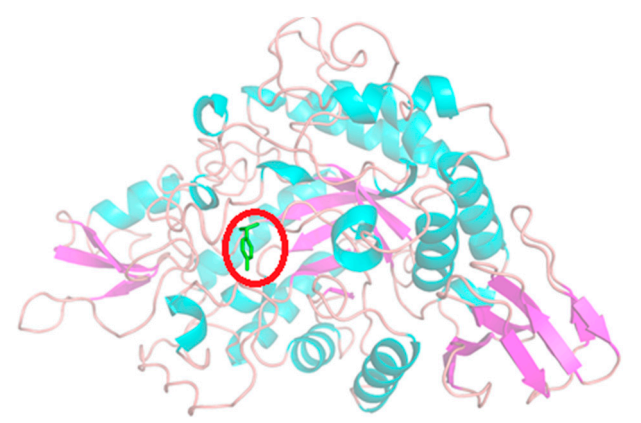

**Figure S5.** Molecular docking pattern of  $\alpha$ -glucosidase and terpinene

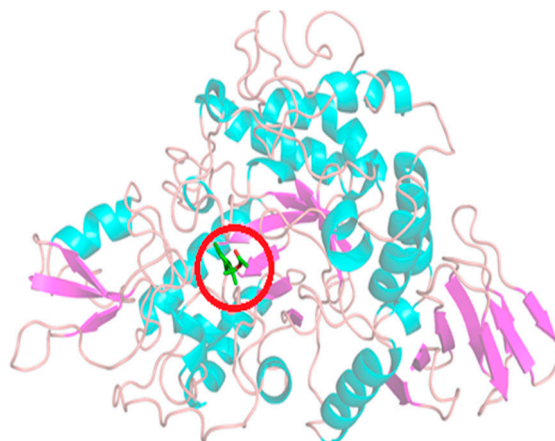

**Figure S6.** Molecular docking pattern of  $\alpha$ -glucosidase and terpineol acetate

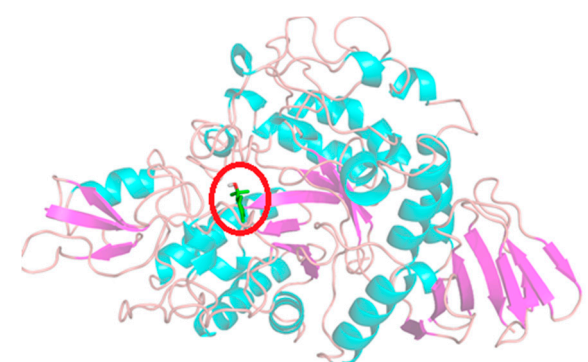

**Figure S7.** Molecular docking pattern of  $\alpha$ -glucosidase and  $\alpha$ -terpineol
